# Supplementary material for: Genome Transfer Prevents Fragmentation and Restores Developmental Potential of Developmentally Compromised Postovulatory Aged Mouse Oocytes
Source: PubMed Central journal article supplement — Stem Cell Reports. 2017 Feb 24;8(3):576–88. doi: 10.1016/j.stemcr.2017.01.020 (PMC5355644; doi:10.1016/j.stemcr.2017.01.020), 2017-02-24
Supplement: mmc1.pdf [file mmc1.pdf]

**Stem Cell Reports, Volume 8**

**Supplemental Information**

**Genome Transfer Prevents Fragmentation and Restores Developmental Potential of Developmentally Compromised Postovulatory Aged Mouse Oocytes**

**Mitsutoshi Yamada and Dieter Egli**

A

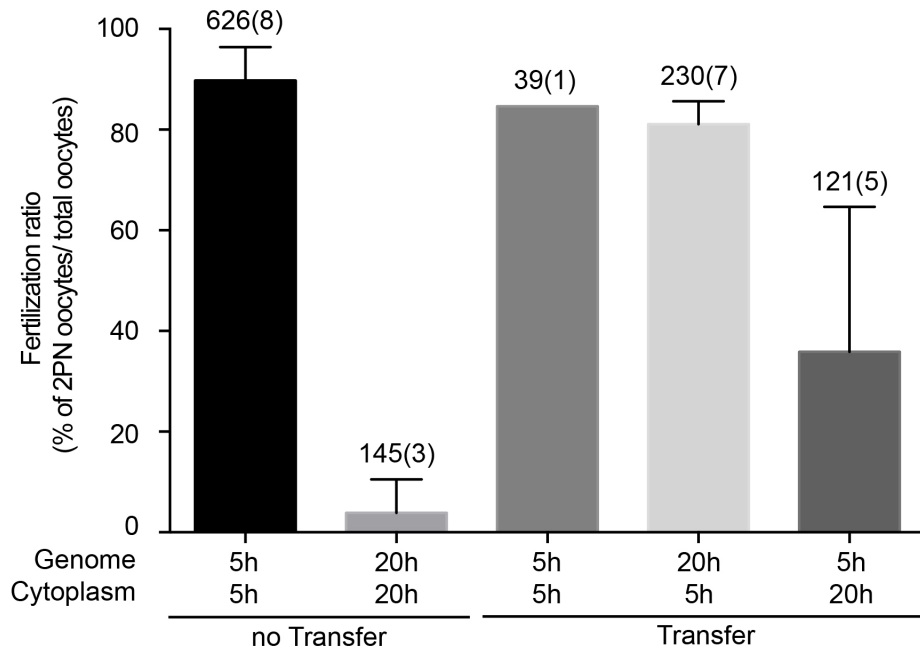

Fig. S1

**A**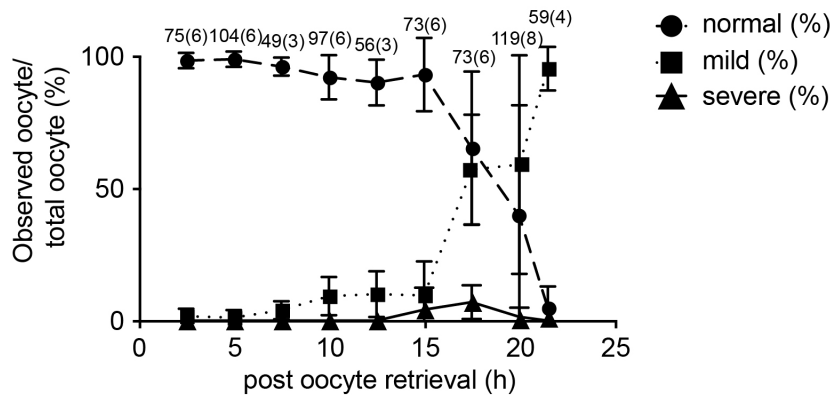**B**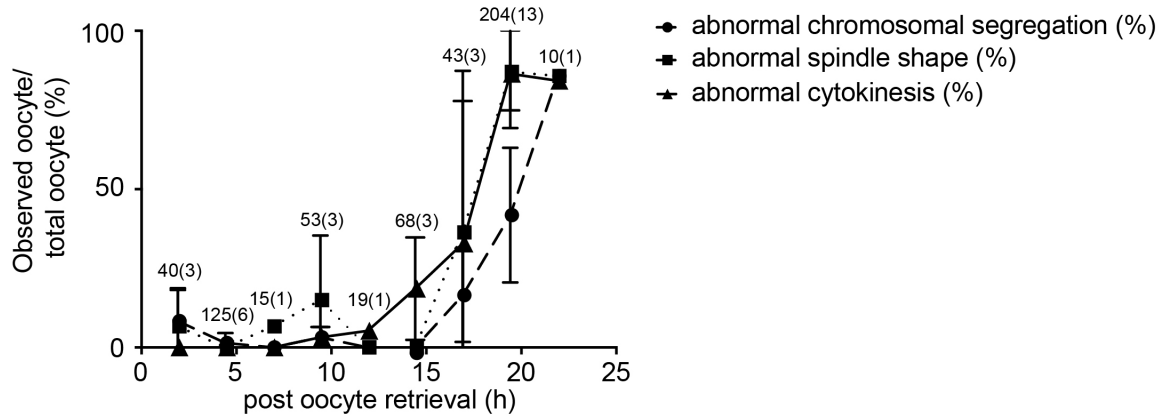**Fig.S2**

1 **Supplemental Legends**

2

3 **Figure S1 (Related to Figure 2). Fertilization ratio after IVF using unmanipulated or manipulated**  
4 **oocytes**

5 Fertilization ratio of unmanipulated oocytes (5 hours and 20 hours post oocyte retrieval oocytes) and  
6 manipulated oocytes (nuclear genomes between 5 hours post oocyte retrieval oocytes (5G5C oocytes),  
7 genome from 20 hours post retrieval oocytes transferred into 5 hours post oocyte retrieval oocytes (20G5C  
8 oocytes) and genomes from 5 hours post retrieval oocytes transferred into 20 hours post oocyte retrieval  
9 oocytes (5G20C)). The error bars show mean  $\pm$  SEM.

10

11 **Figure S2 (Related to Figure 4.). Chromosomal defects and cytokinesis during postovulatory aging**

12 (A) Frequency of chromosomal alignment defects in MII oocytes aged for up to 21.5h. The total number of  
13 oocytes and the number of experiments (in parenthesis) is indicated above each column.

14 (B) Frequency of chromosomal defects and abnormal cytokinesis in oocytes aged for up to 22.0h, scored for  
15 misalignment at anaphase of the second meiosis. The error bars show mean  $\pm$  SEM.

16
